# Supplementary material for: A Survey of Pediatric Radiologists’ Perceptions of the Climate Crisis, Its Potential for Patient Harm, and the Role of Health Systems in Mitigation
Source: Research Square preprint supplement (doi:10.21203/rs.3.rs-8490713/v1), 2026-01-16

**Title: A Survey of Pediatric Radiologists’ Perceptions of the Climate Crisis, Its Potential for Patient Harm, and the Role of Health Systems in Mitigation**

**Supplemental Table 1:** Regional map used as a reference for respondents when answering number 2


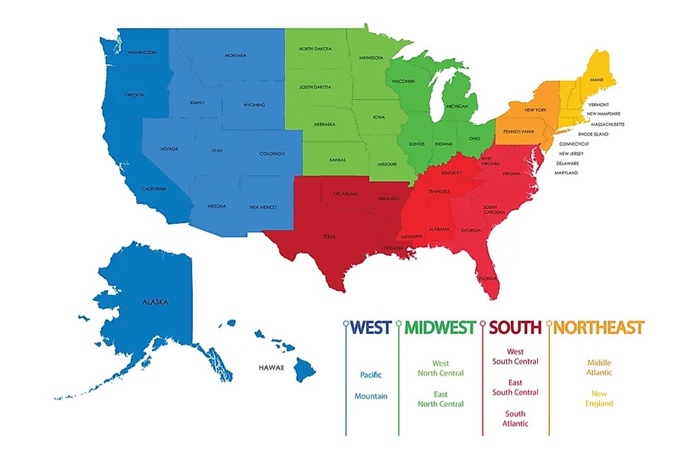

Supplement: Supplementary file 1 [file e81f8e34f11a3b31316b956b.docx]
